# Supplementary material
Source: PubMed Central journal article supplement (PMC5411134)
Supplement: supp_pp.16.01482_PP2016-01482DR2_Supplemental_Materialfig1.pdf [file supp_pp.16.01482_PP2016-01482DR2_Supplemental_Materialfig1.pdf]

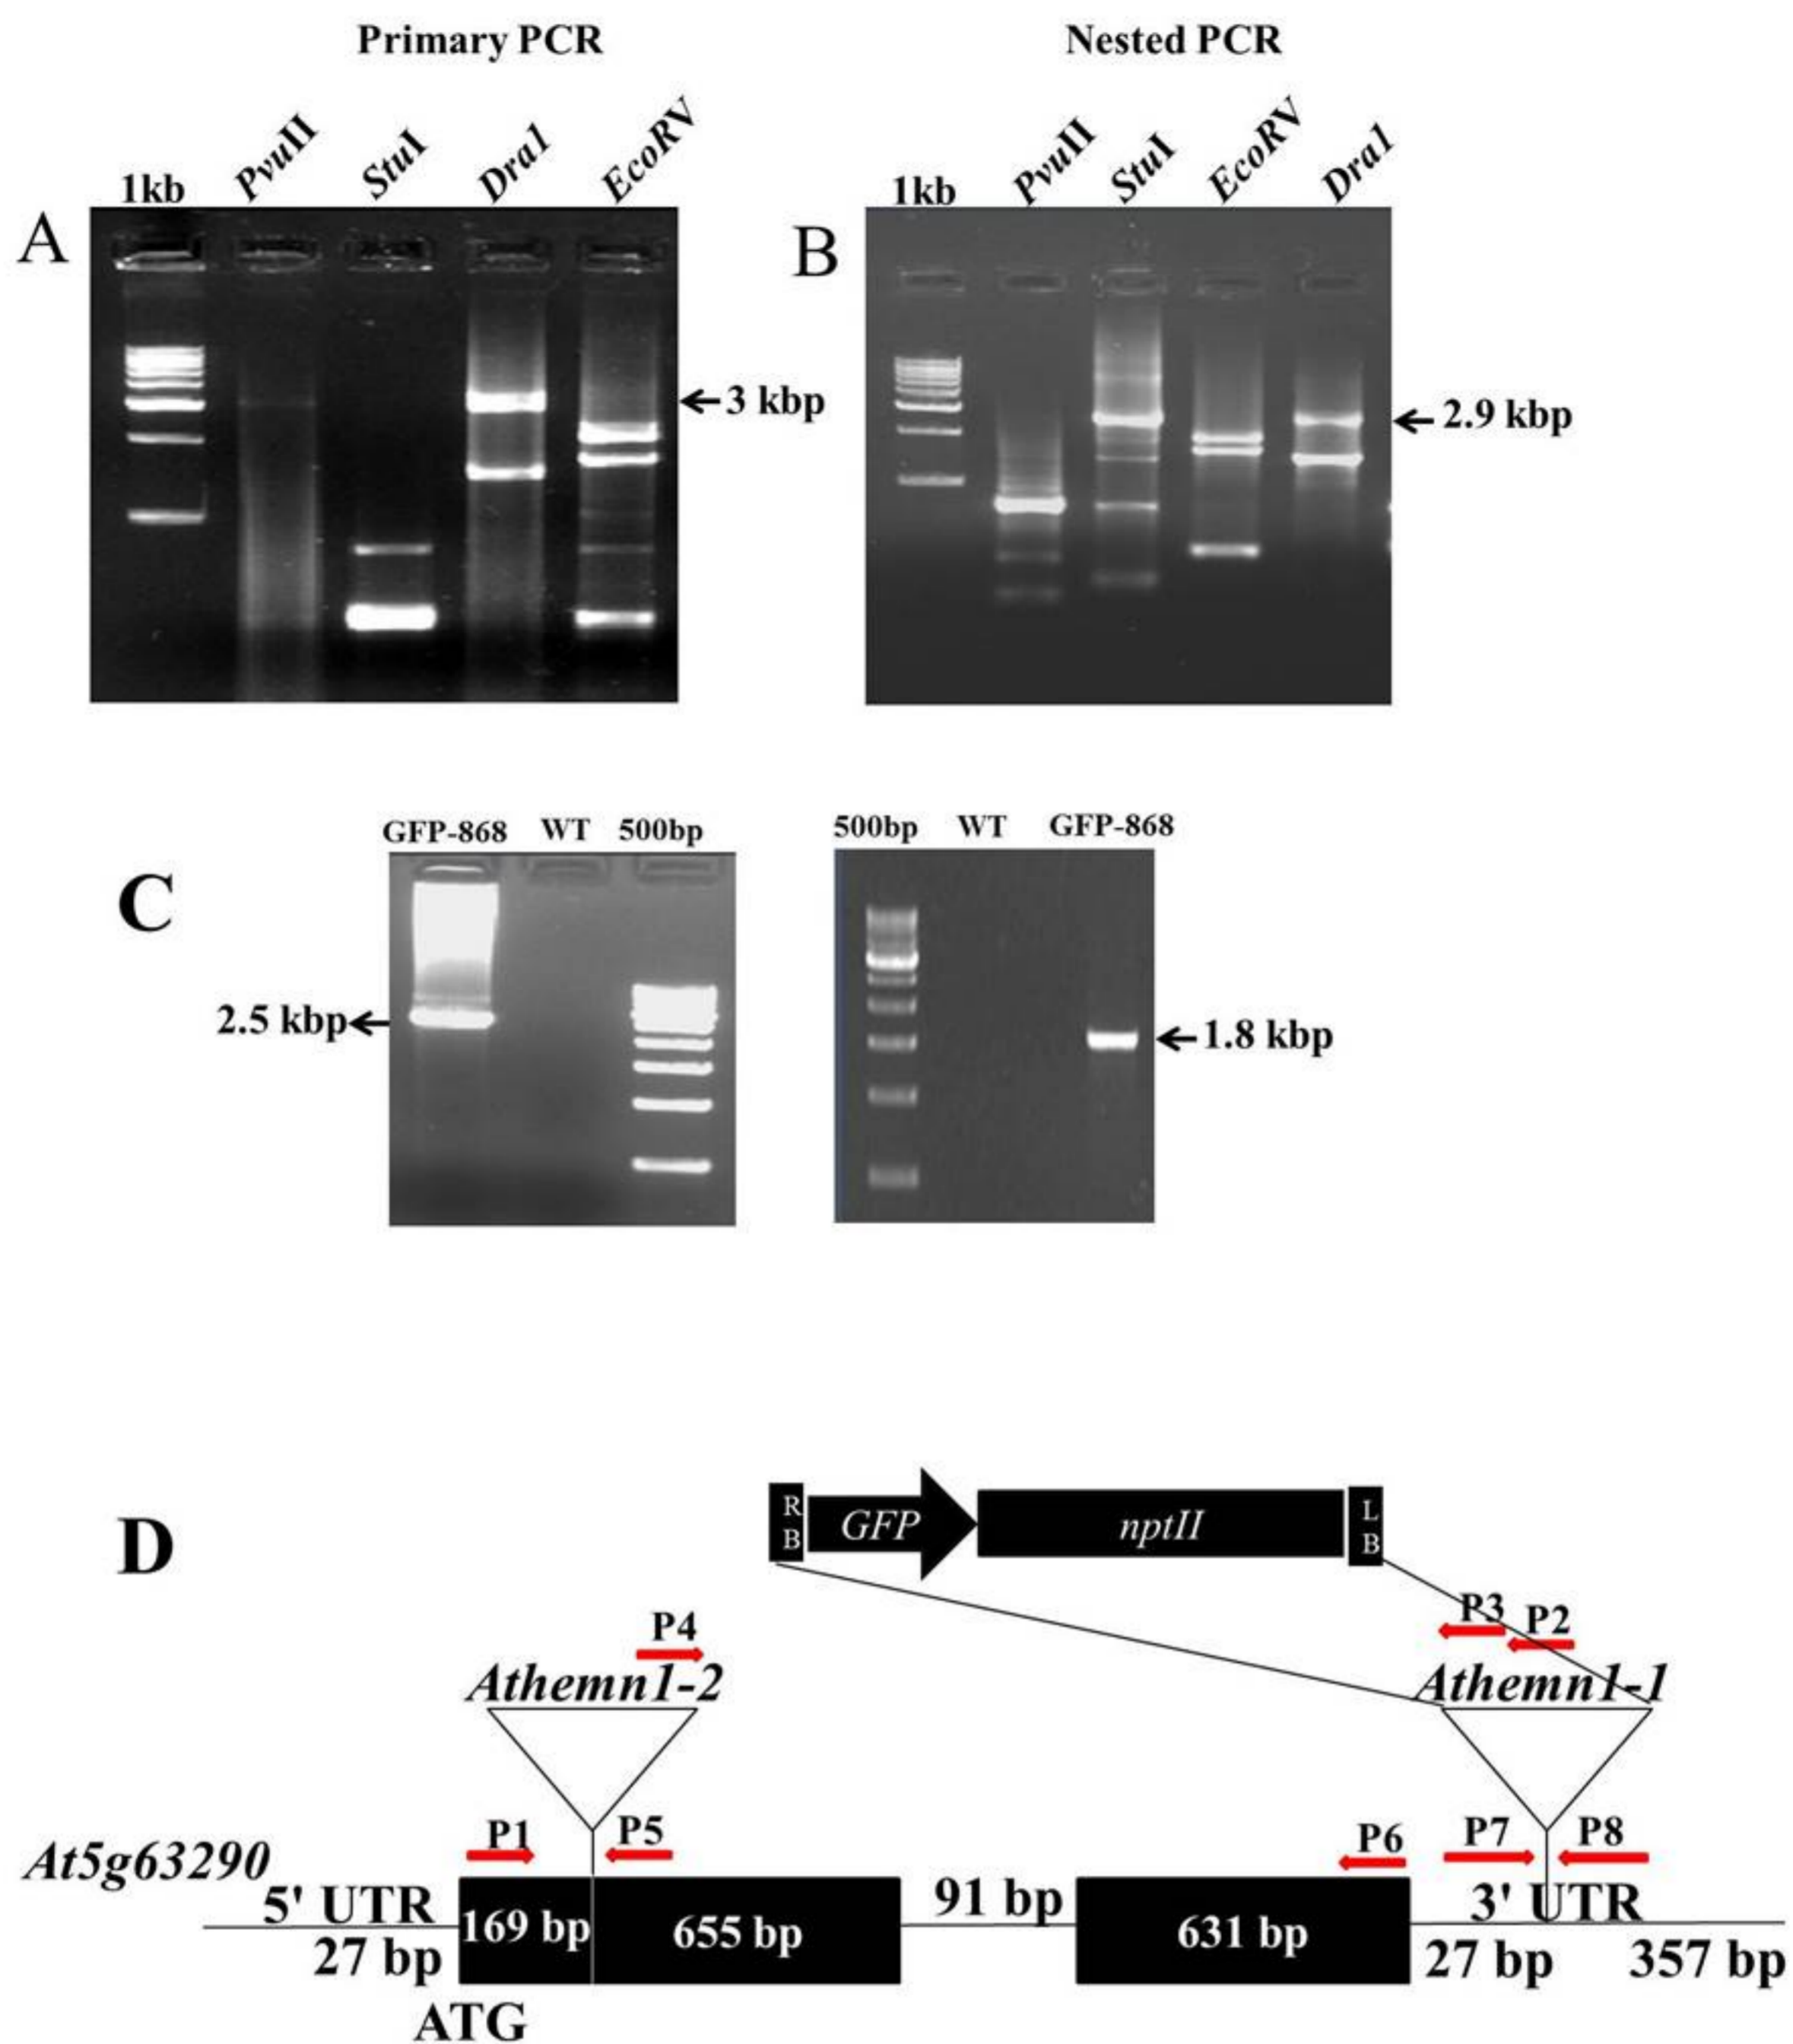

**Supplemental Figure S1.** Identification and diagrammatic representation of T-DNA insertion in GFP-868 mutant by Genome Walking approach. (A) PCR amplicons obtained with AP1 and TDRB primers using DNA from Genome Walking libraries of *Athemn1-1* mutant prepared with *PvuII*, *StuI*, *DraI* and *EcoRV*. (B) Amplified product in the secondary PCR with AP2 and NGWGS primers. (C) PCR products of 2.5 kbp and 1.8 kbp obtained in the mutant with P1-P2 and P1-P3 primers, respectively, confirmed the insertion site of T-DNA in the *AtHEMN1* (*At5g63290*) gene. (D) Diagrammatic representation of T-DNA insertion on chromosome 5 of *A. thaliana* in GFP-868 and SALK\_100305 mutants. Based on T-DNA insertion in the *At5g63290* gene, the two mutants are designated as *Athemn1-1* and *Athemn1-2*, respectively. Locations of primers used for confirmation of insertions and isolation of mutant plants are indicated by arrows.
