# Supplementary material
Source: PubMed Central journal article supplement (PMC5411134)
Supplement: supp_pp.16.01482_PP2016-01482DR2_Supplemental_Materialfig2.pdf [file supp_pp.16.01482_PP2016-01482DR2_Supplemental_Materialfig2.pdf]

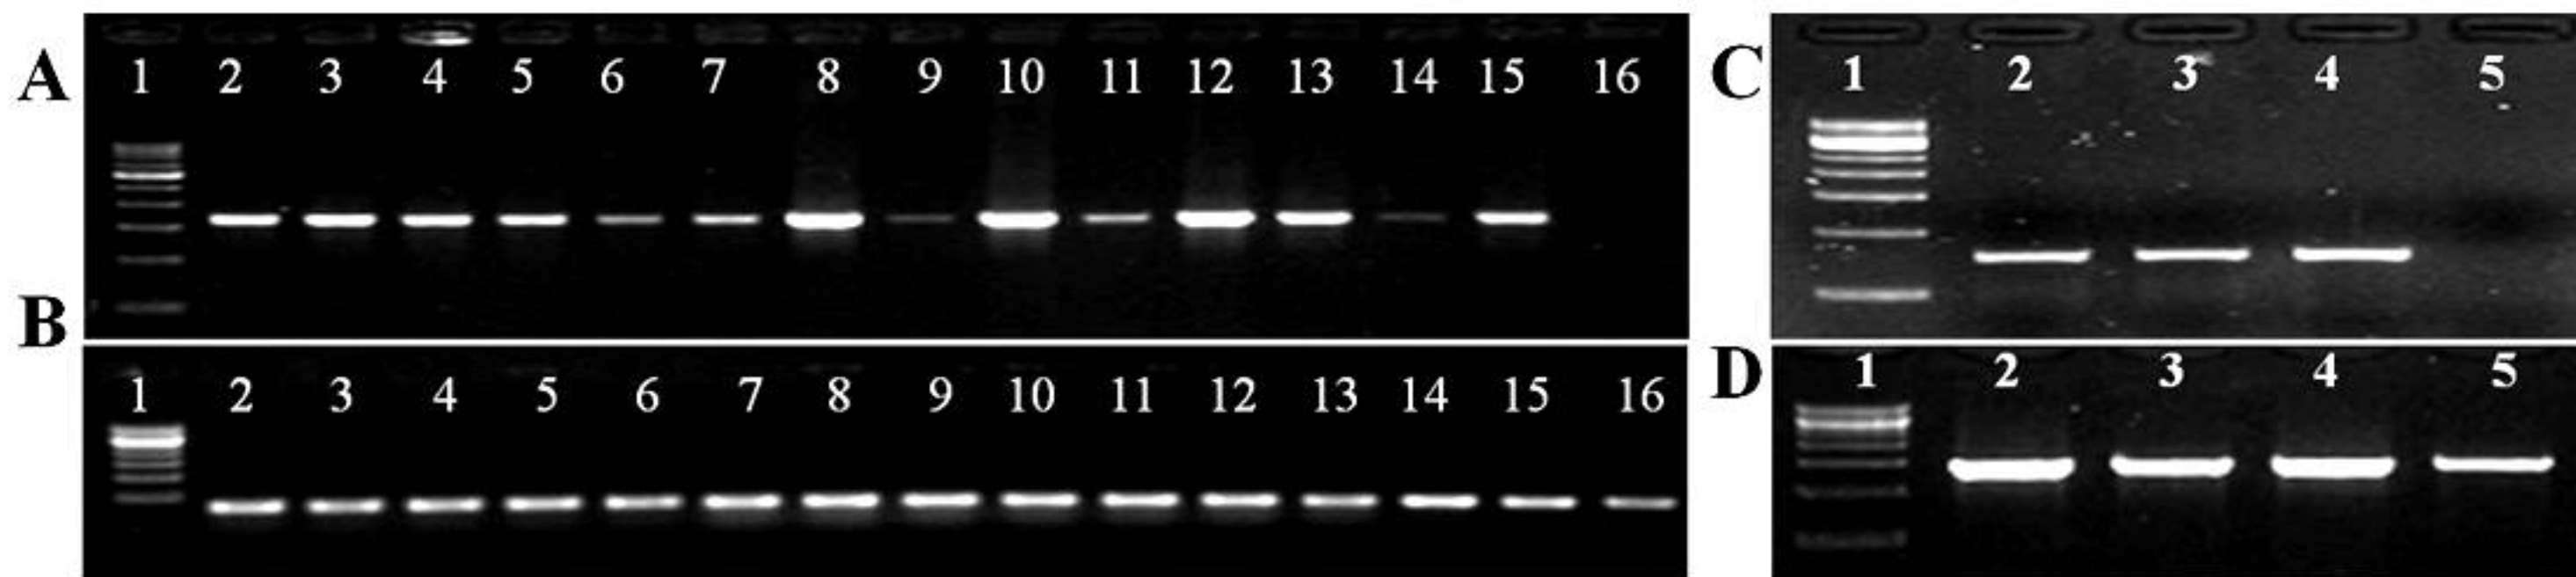

**Supplemental Figure S2.** Genotyping of *Athemn1-1* and *Athemn1-2* mutant plants through PCR. (A) PCR with the primers P1 and P3 gave the expected 1.8 kbp T-DNA specific amplicon in all kanamycin positive progenies (lane 2-15) of the *Athemn1-1* mutant. (B) PCR of the plants in A above with the primers P7 and P8 gave 407 bp WT allele specific amplicon which confirmed that all the kanamycin positive plants are heterozygous for T-DNA. Lane 1, 500 bp molecular weight marker, lane 16, WT. (C) PCR with primers P4 and P5 gave 637 bp T-DNA specific amplicon in kanamycin positive progenies (lane 2-4) of the *Athemn1-2* mutant and confirmed the presence of T-DNA. (D) PCR of the plants in C above with primers P1 and P6 gave WT allele specific 1.5 kbp amplicon. These results confirmed that all kanamycin positive plants are heterozygous for the T-DNA insertion. Lane 1, 500 bp molecular weight marker, lane 5, WT.
