# Supplementary material
Source: PubMed Central journal article supplement (PMC5411134)
Supplement: supp_pp.16.01482_PP2016-01482DR2_Supplemental_Materialfig3.pdf [file supp_pp.16.01482_PP2016-01482DR2_Supplemental_Materialfig3.pdf]

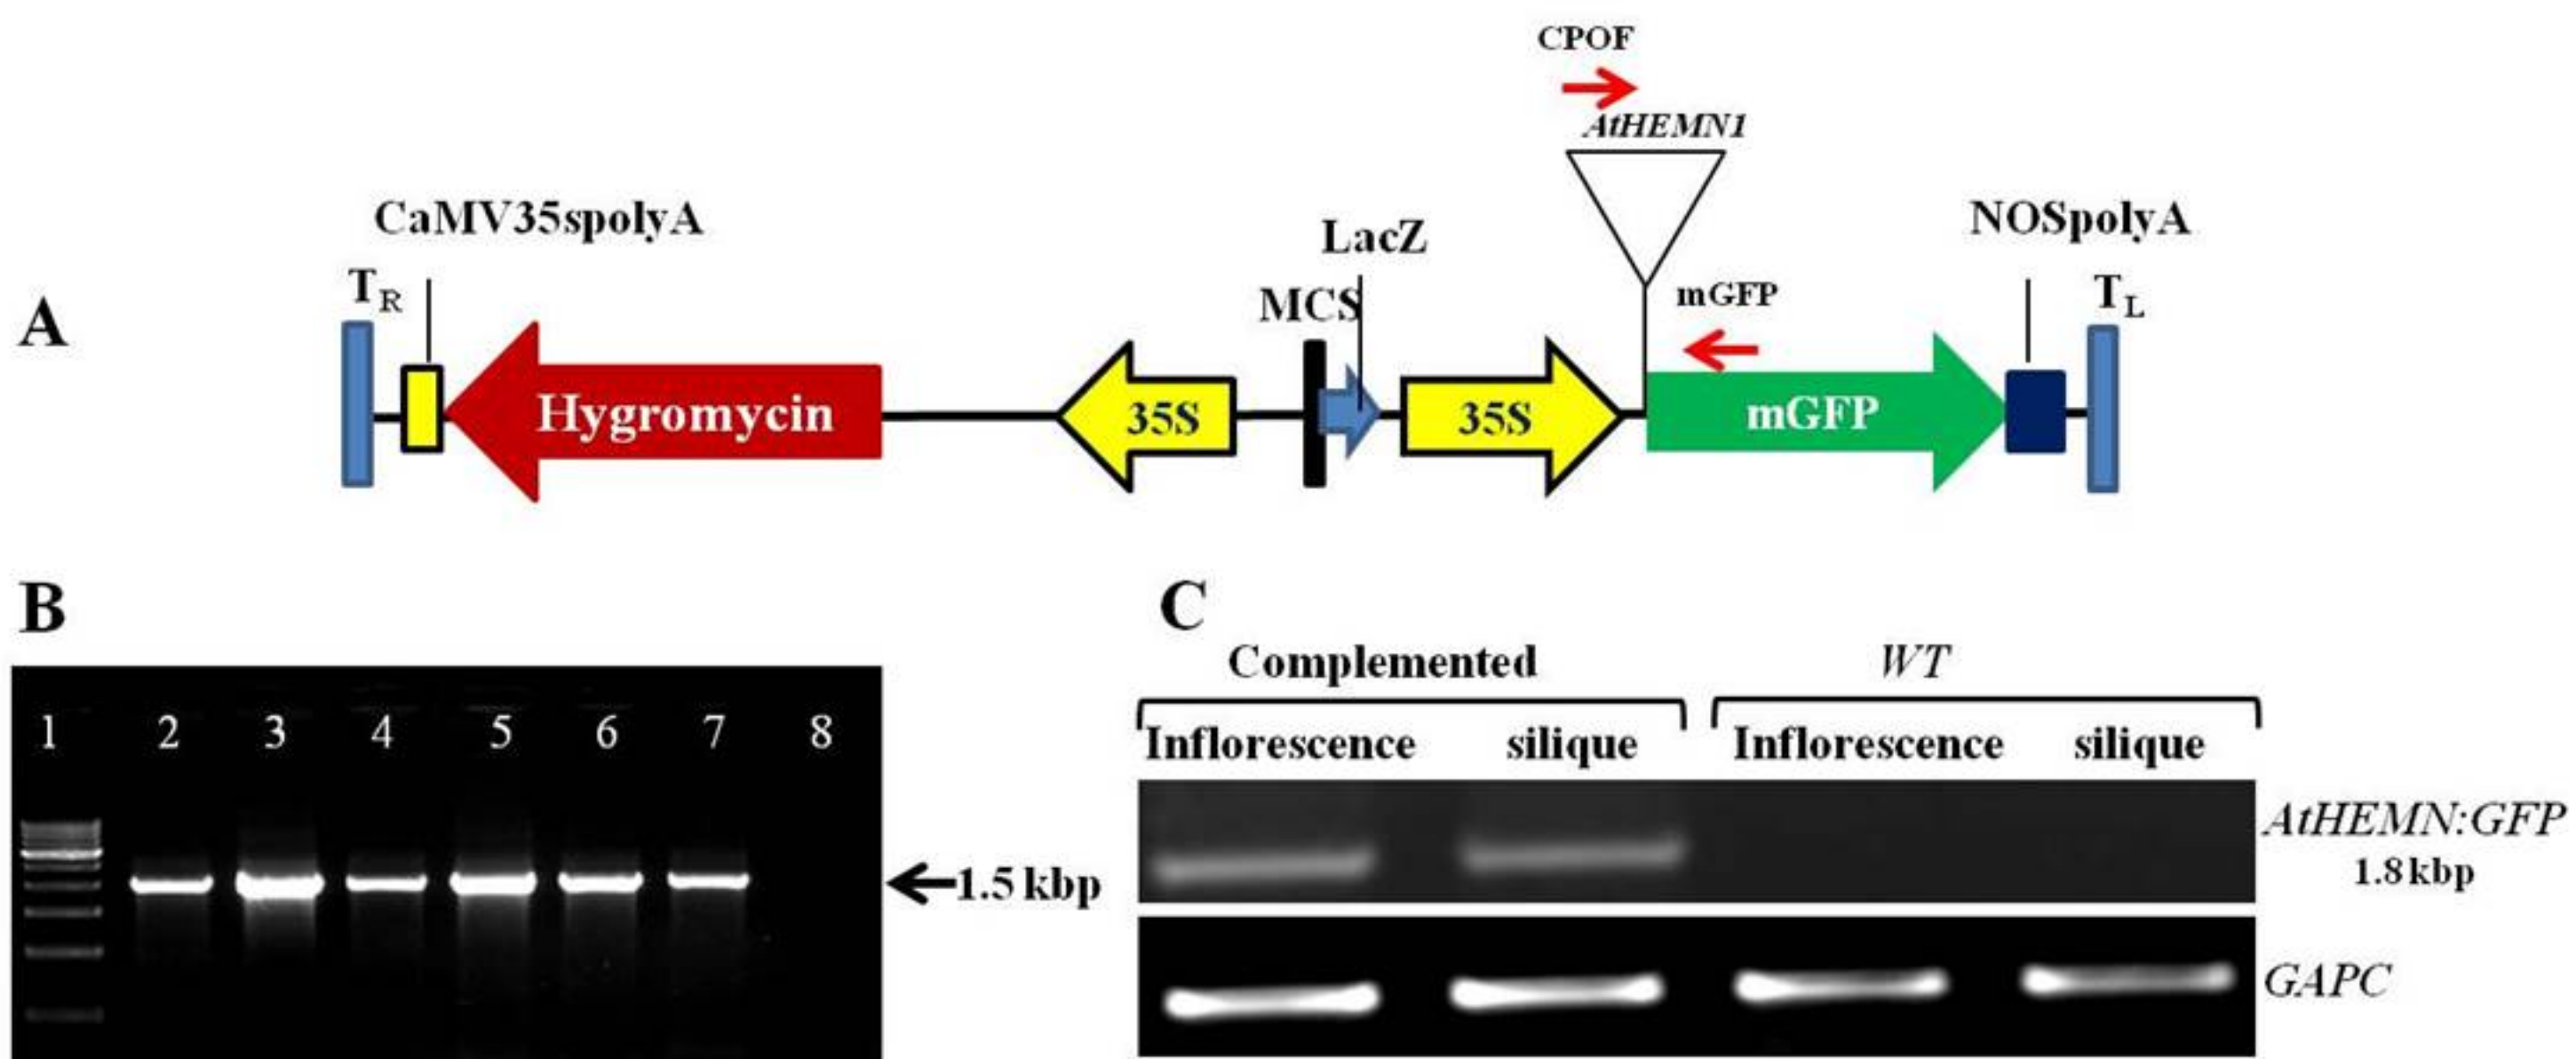

**Supplemental Figure S3.** Complementation of *Athemn1-1* mutant by ectopic expression of *AtHEMN1* gene. (A) Diagrammatic representation of T-DNA region of pCAMBIA1302 vector constructed to overexpress *AtHEMN1* cDNA. (B) PCR amplifications using primers P1 and P6 confirmed the presence of *AtHEMN1* cDNA (~1.5 kbp) in hygromycin positive complemented transgenic *Athemn1-1* plants. Lane 1: 500 bp ladder; lanes 2-7: cDNA complemented lines; lane 8: WT. (C) RT-PCR confirmation of transgene *AtHEMN1-GFP* expression in *Athemn1-1* transgenic lines using P1 and mGFP primers. Amplification of 1.8 kbp *AtHEMN1-GFP* fragment in transgenic plants and its absence in WT confirmed the transgene expression. The locations of primers used for PCR and RT-PCR are shown in Fig. A.
