# Supplementary material
Source: PubMed Central journal article supplement (PMC5411134)
Supplement: supp_pp.16.01482_PP2016-01482DR2_Supplemental_Materialfig5.pdf [file supp_pp.16.01482_PP2016-01482DR2_Supplemental_Materialfig5.pdf]

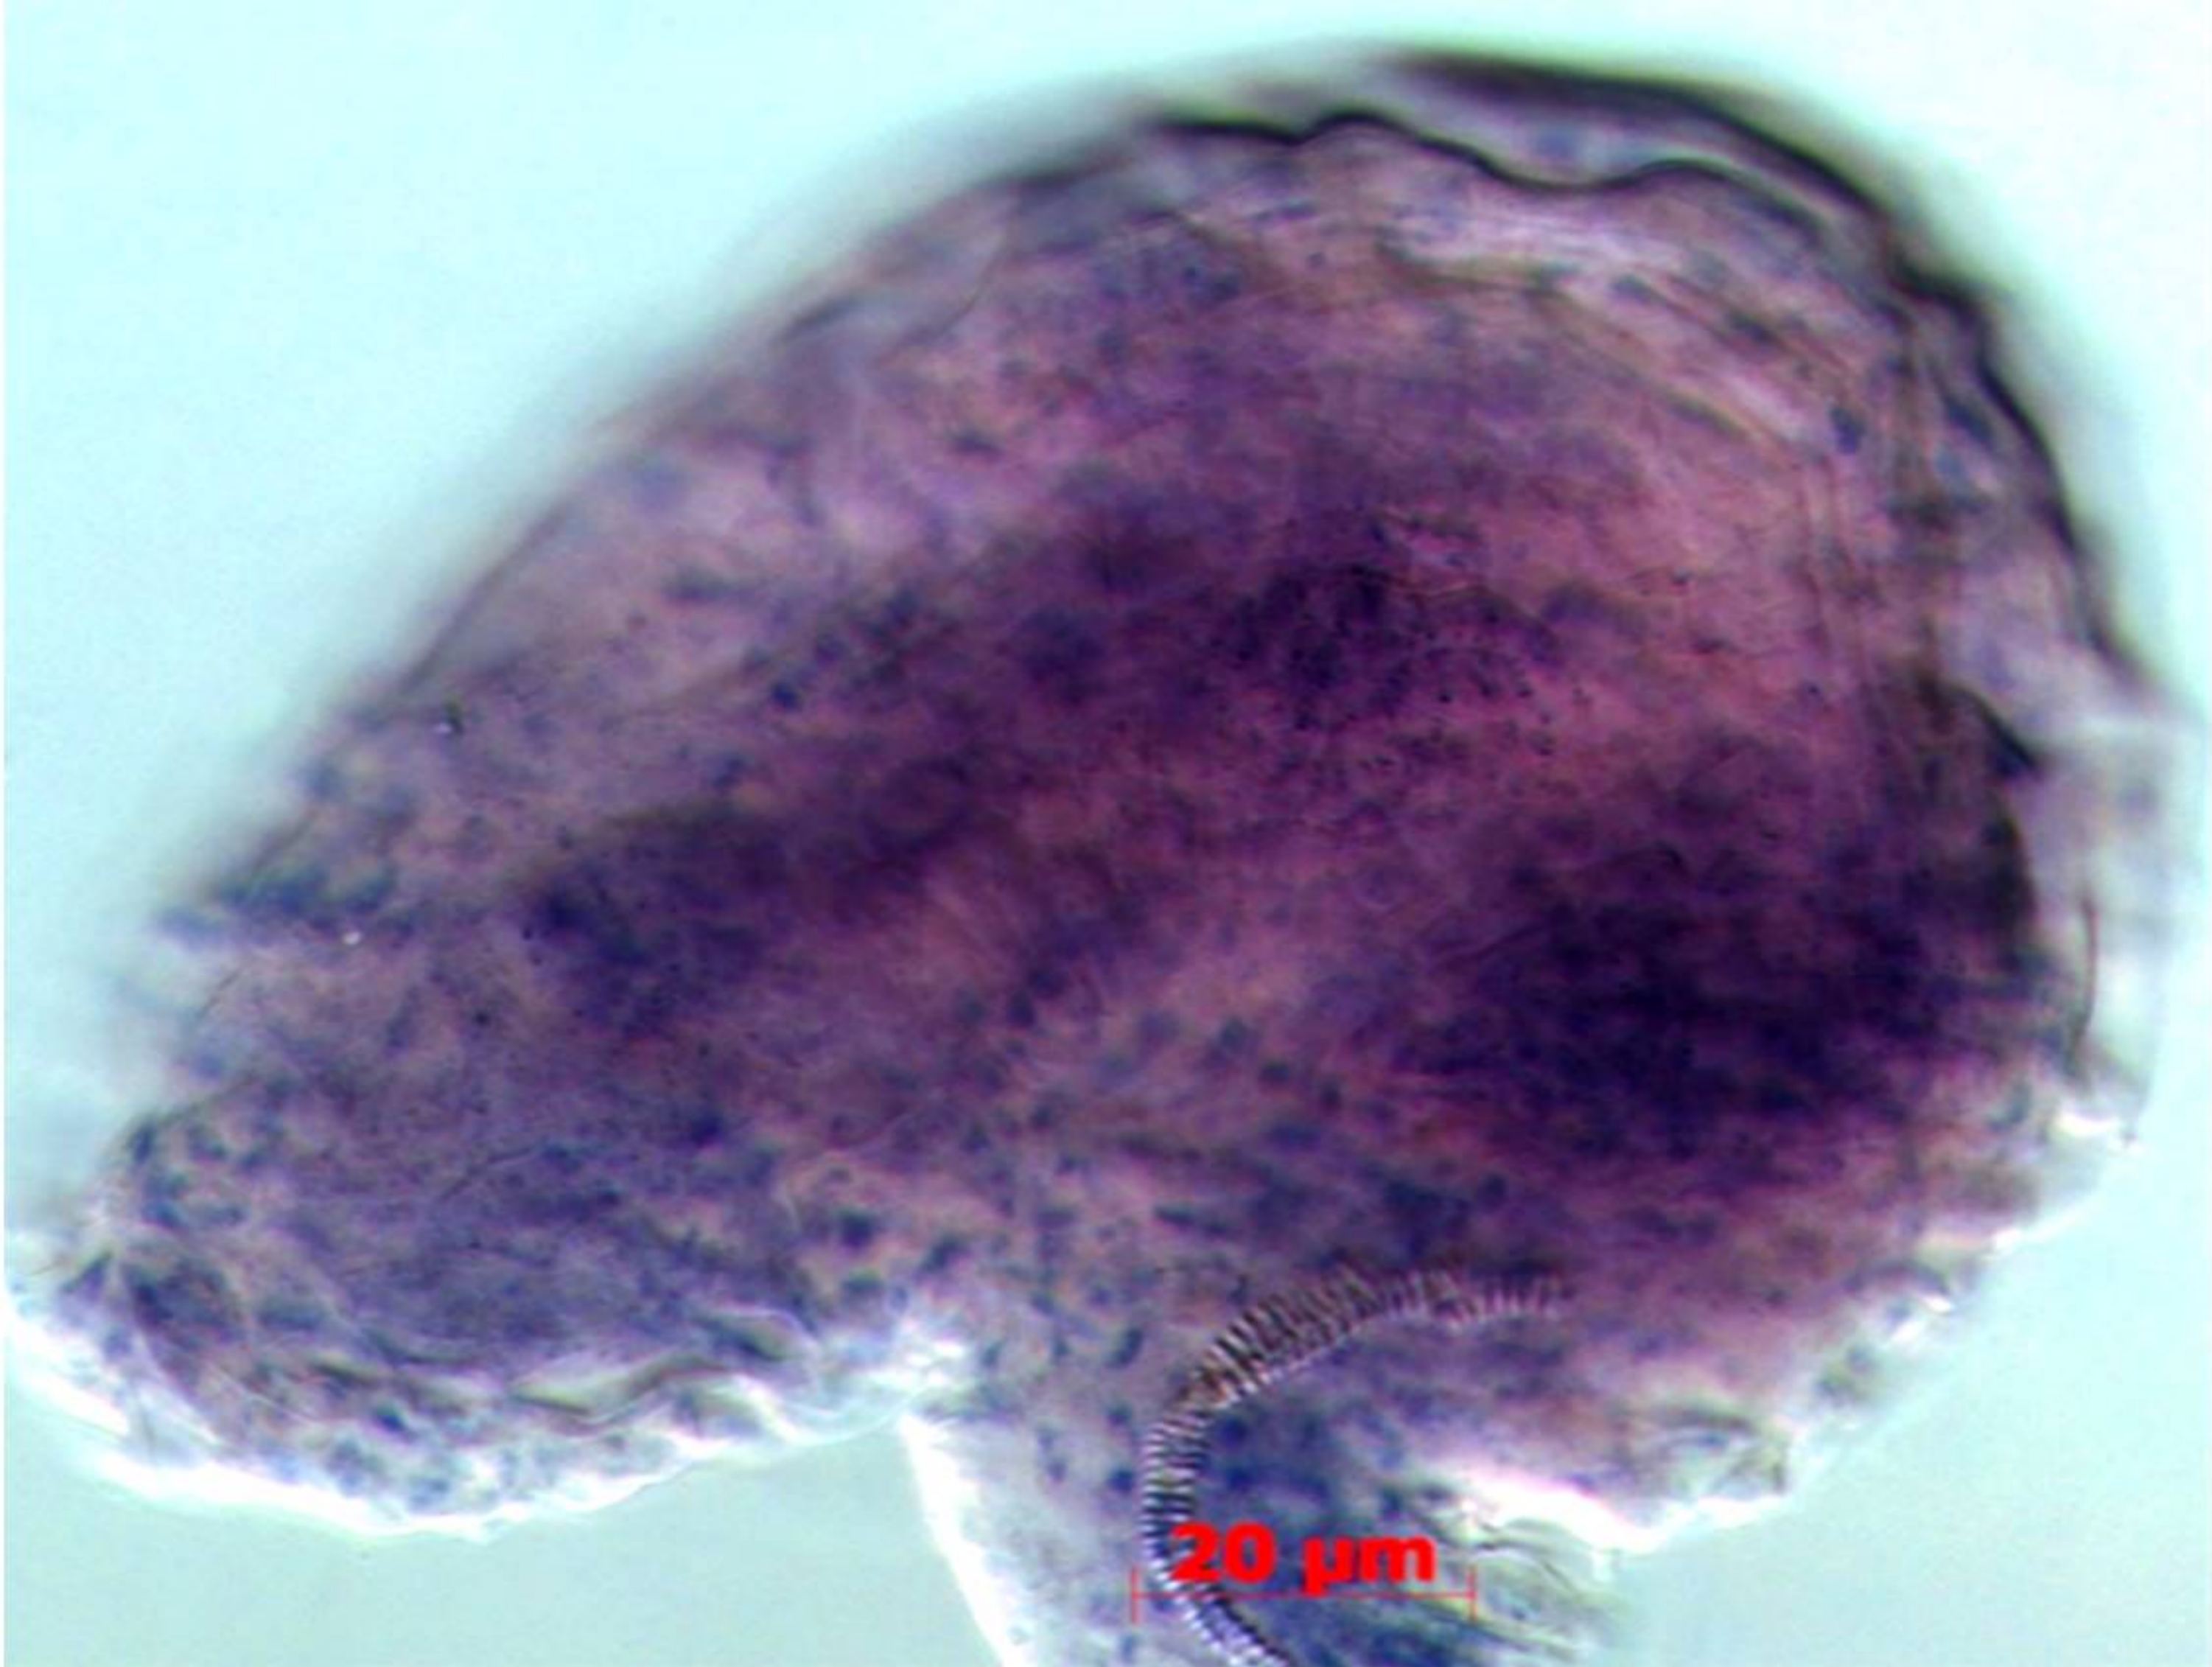

**Supplemental Figure S5.** NBT staining of aborted ovule from *Athemnl1-1* mutant showing accumulation of ROS in the entire ovule.
