# Supplementary material
Source: PubMed Central journal article supplement (PMC5411134)
Supplement: supp_pp.16.01482_PP2016-01482DR2_Supplemental_Materialfig7.pdf [file supp_pp.16.01482_PP2016-01482DR2_Supplemental_Materialfig7.pdf]

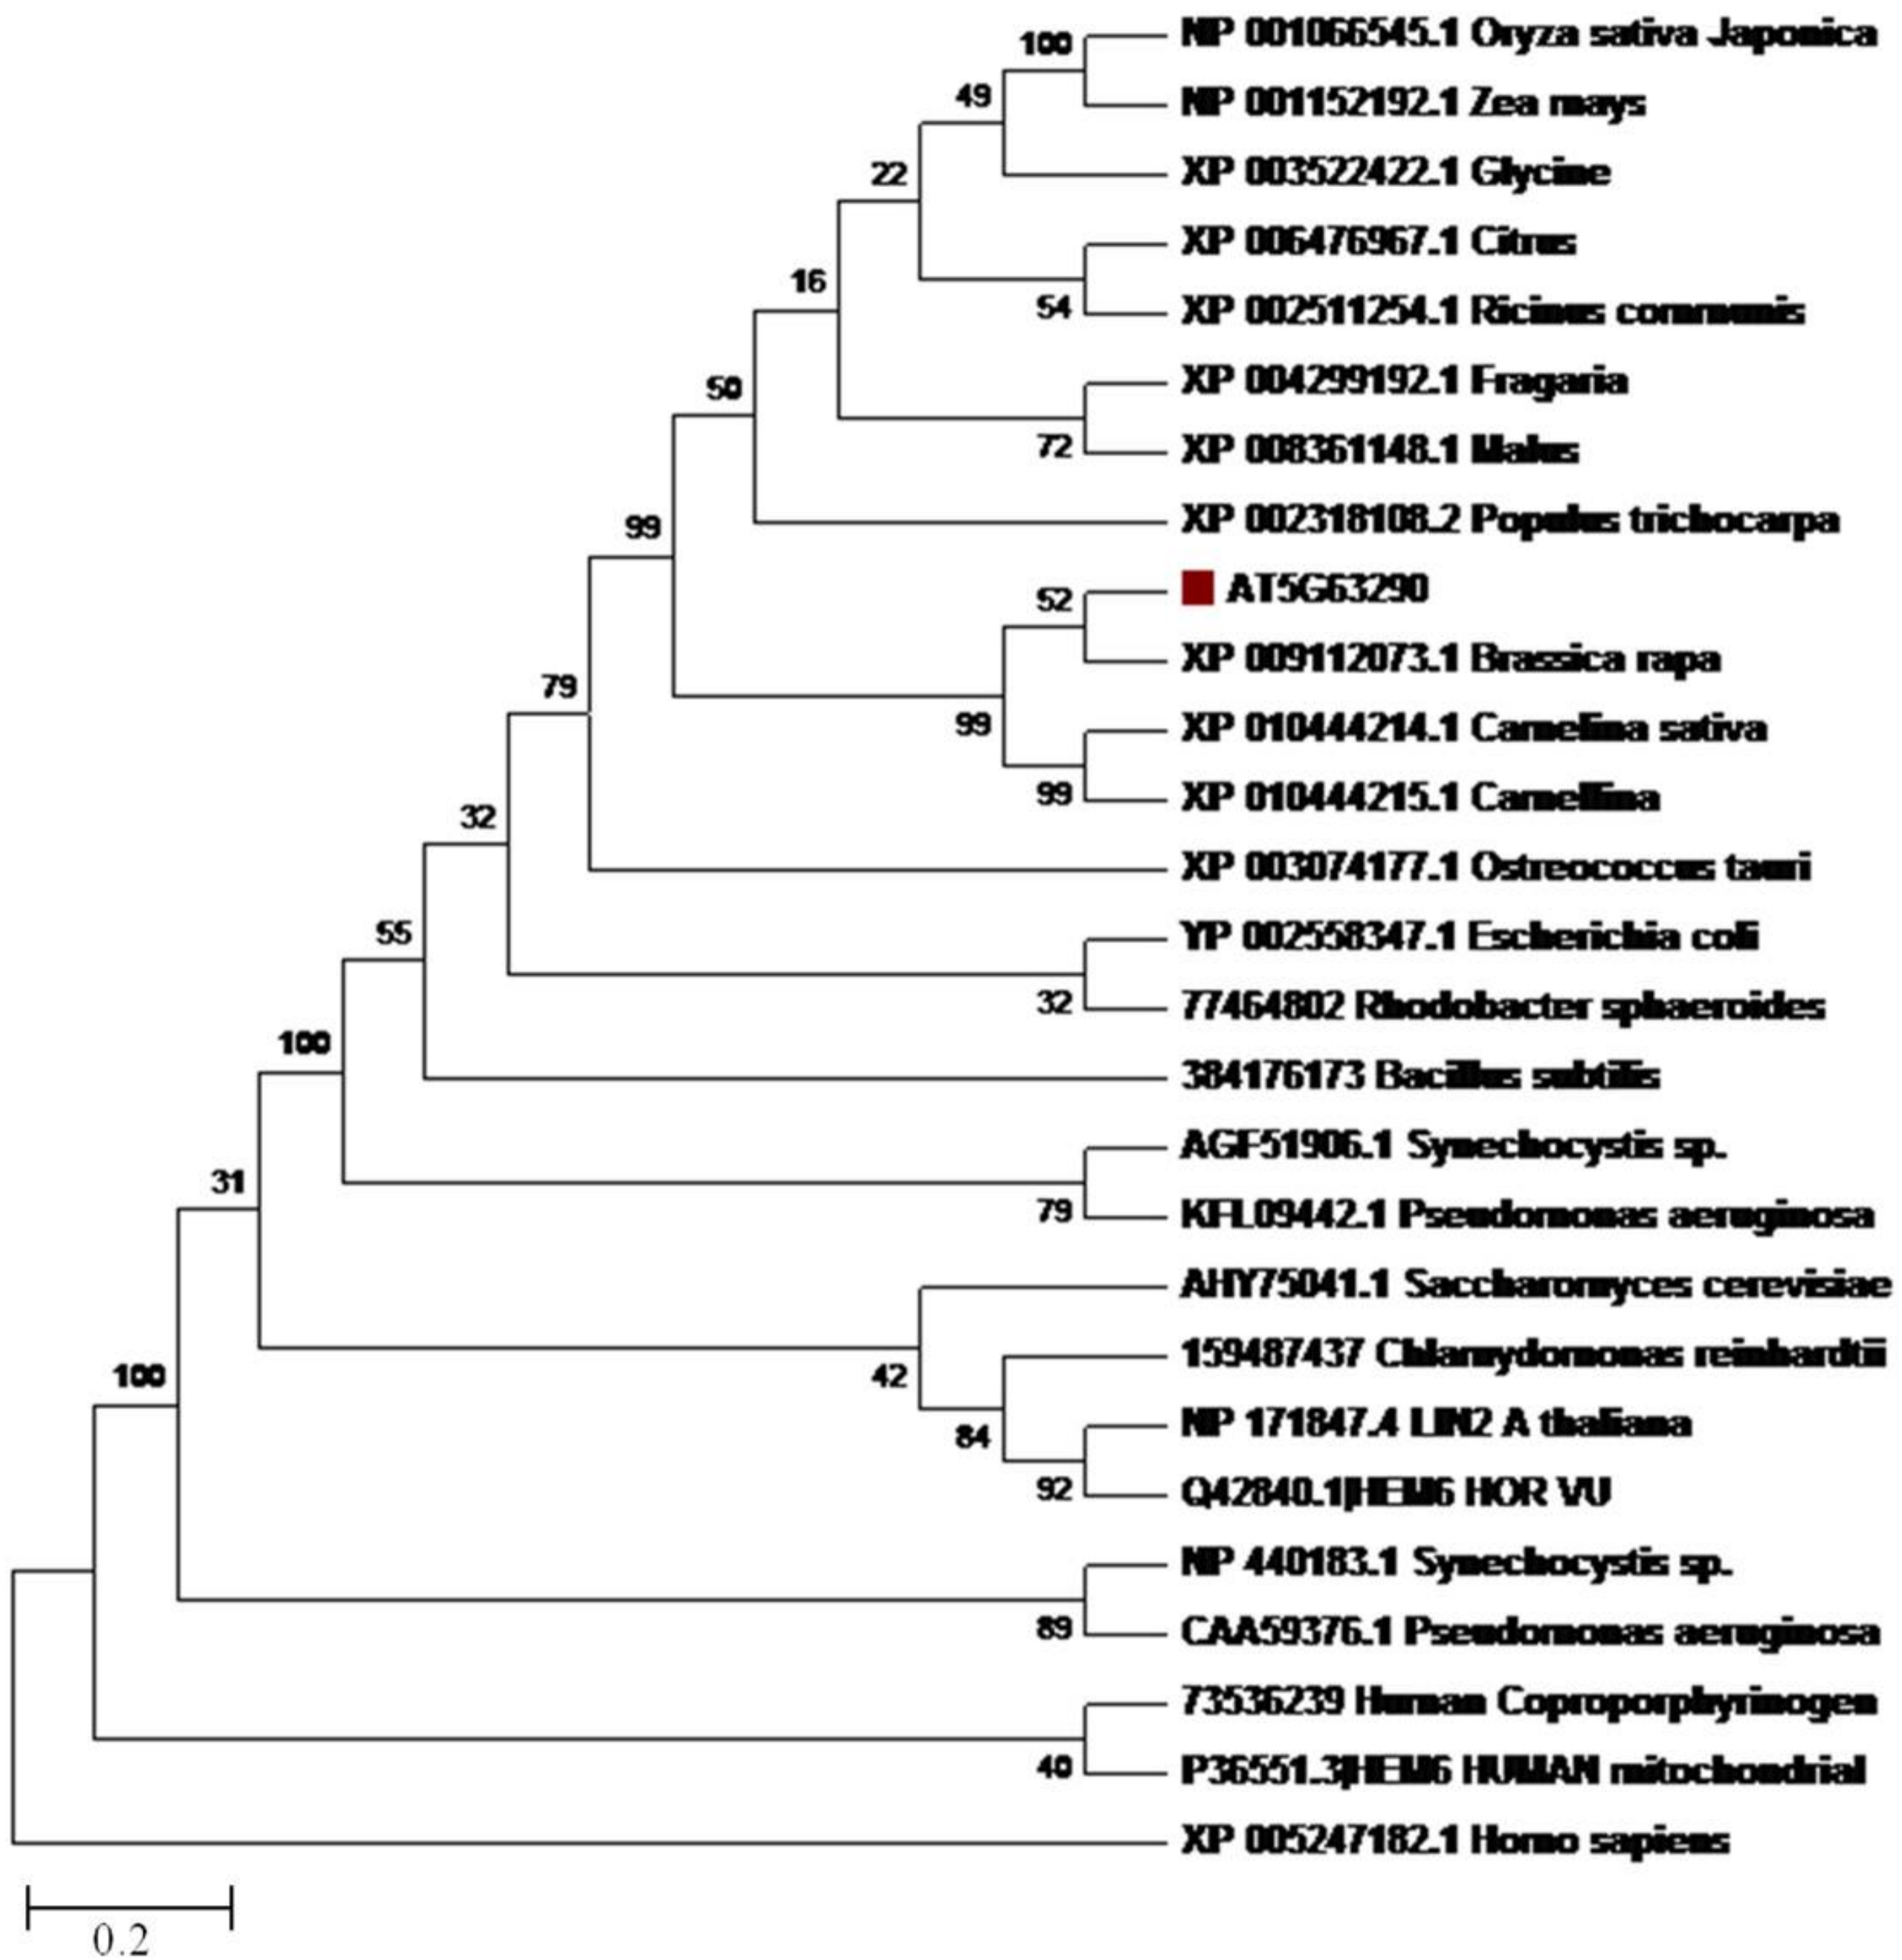

**Supplemental Figure S7.** Phylogenetic tree of HEMN proteins of different genera constructed using neighbor-joining method. AtHEMN1 coding for Coproporphyrinogen III oxidase is conserved across plants, bacteria, fungi and human. Numbers indicate Bootstrap values.
