# Supplementary material
Source: PubMed Central journal article supplement (PMC5411134)
Supplement: supp_pp.16.01482_PP2016-01482DR2_Supplemental_Materialfig8.pdf [file supp_pp.16.01482_PP2016-01482DR2_Supplemental_Materialfig8.pdf]

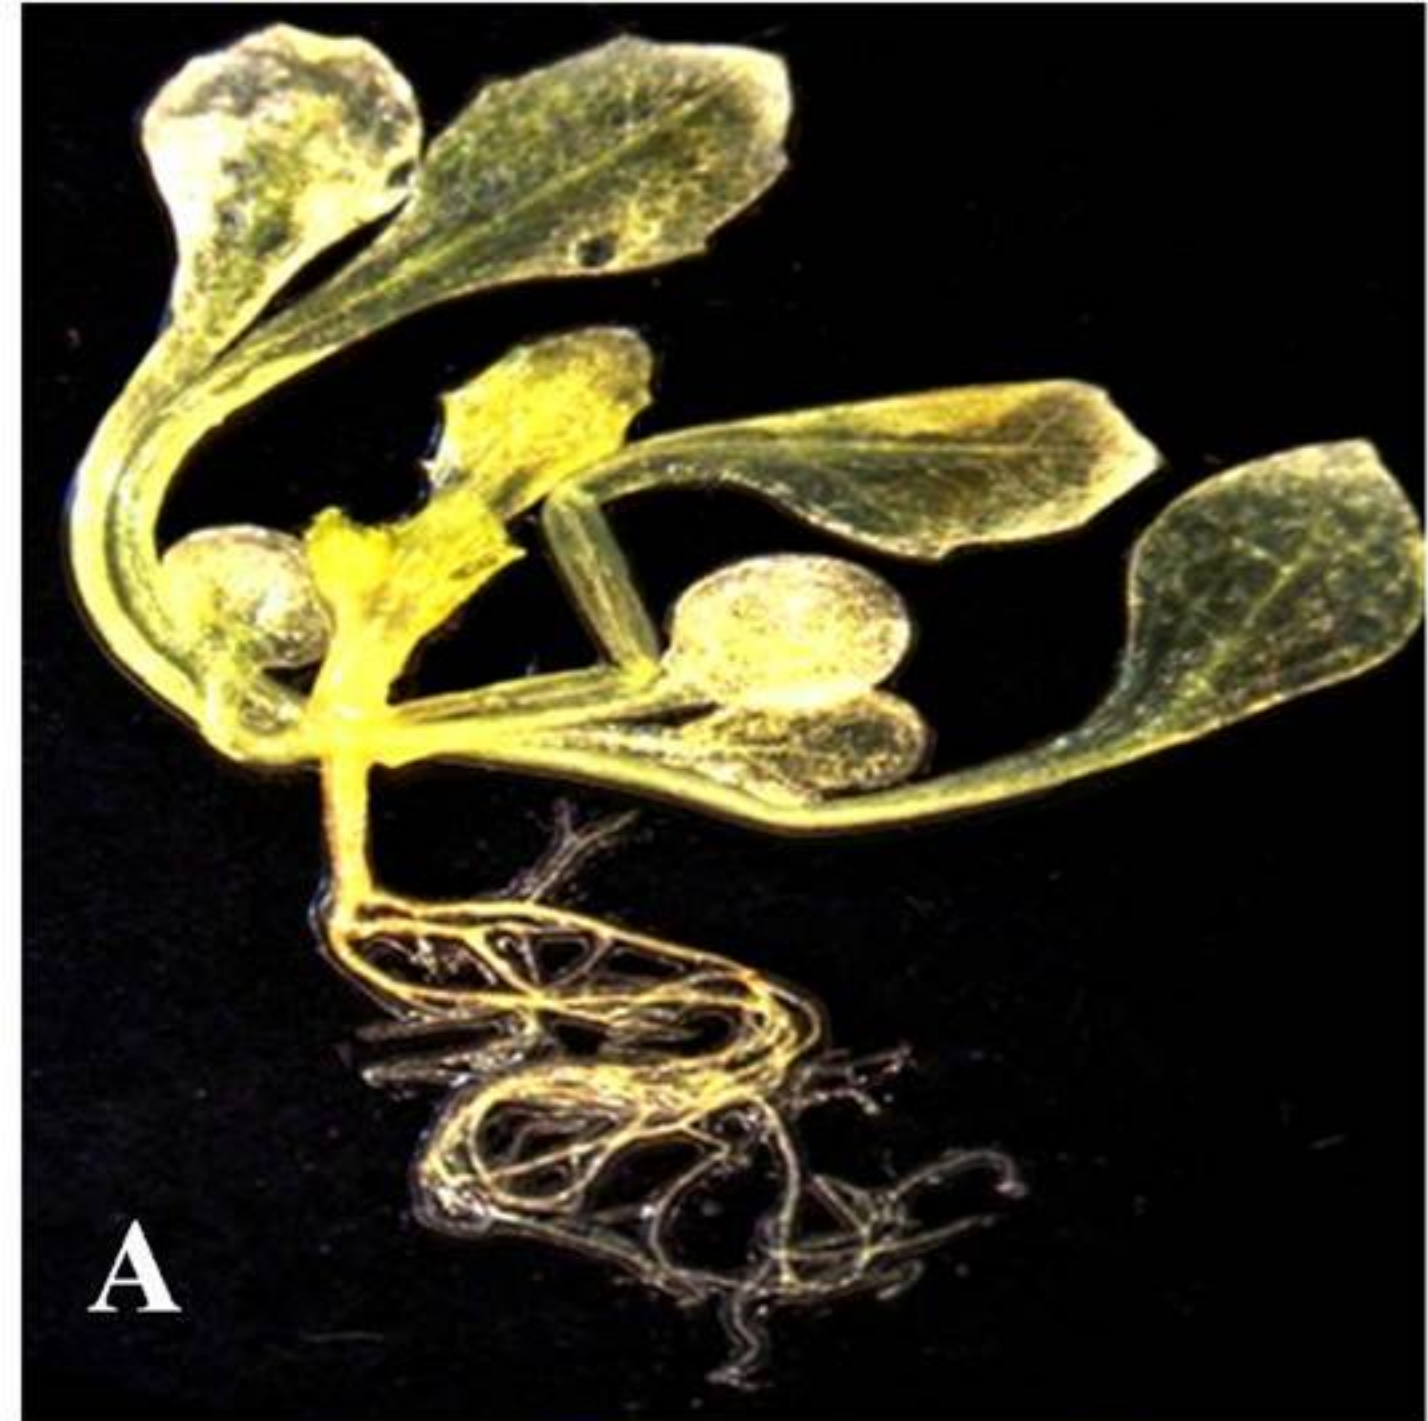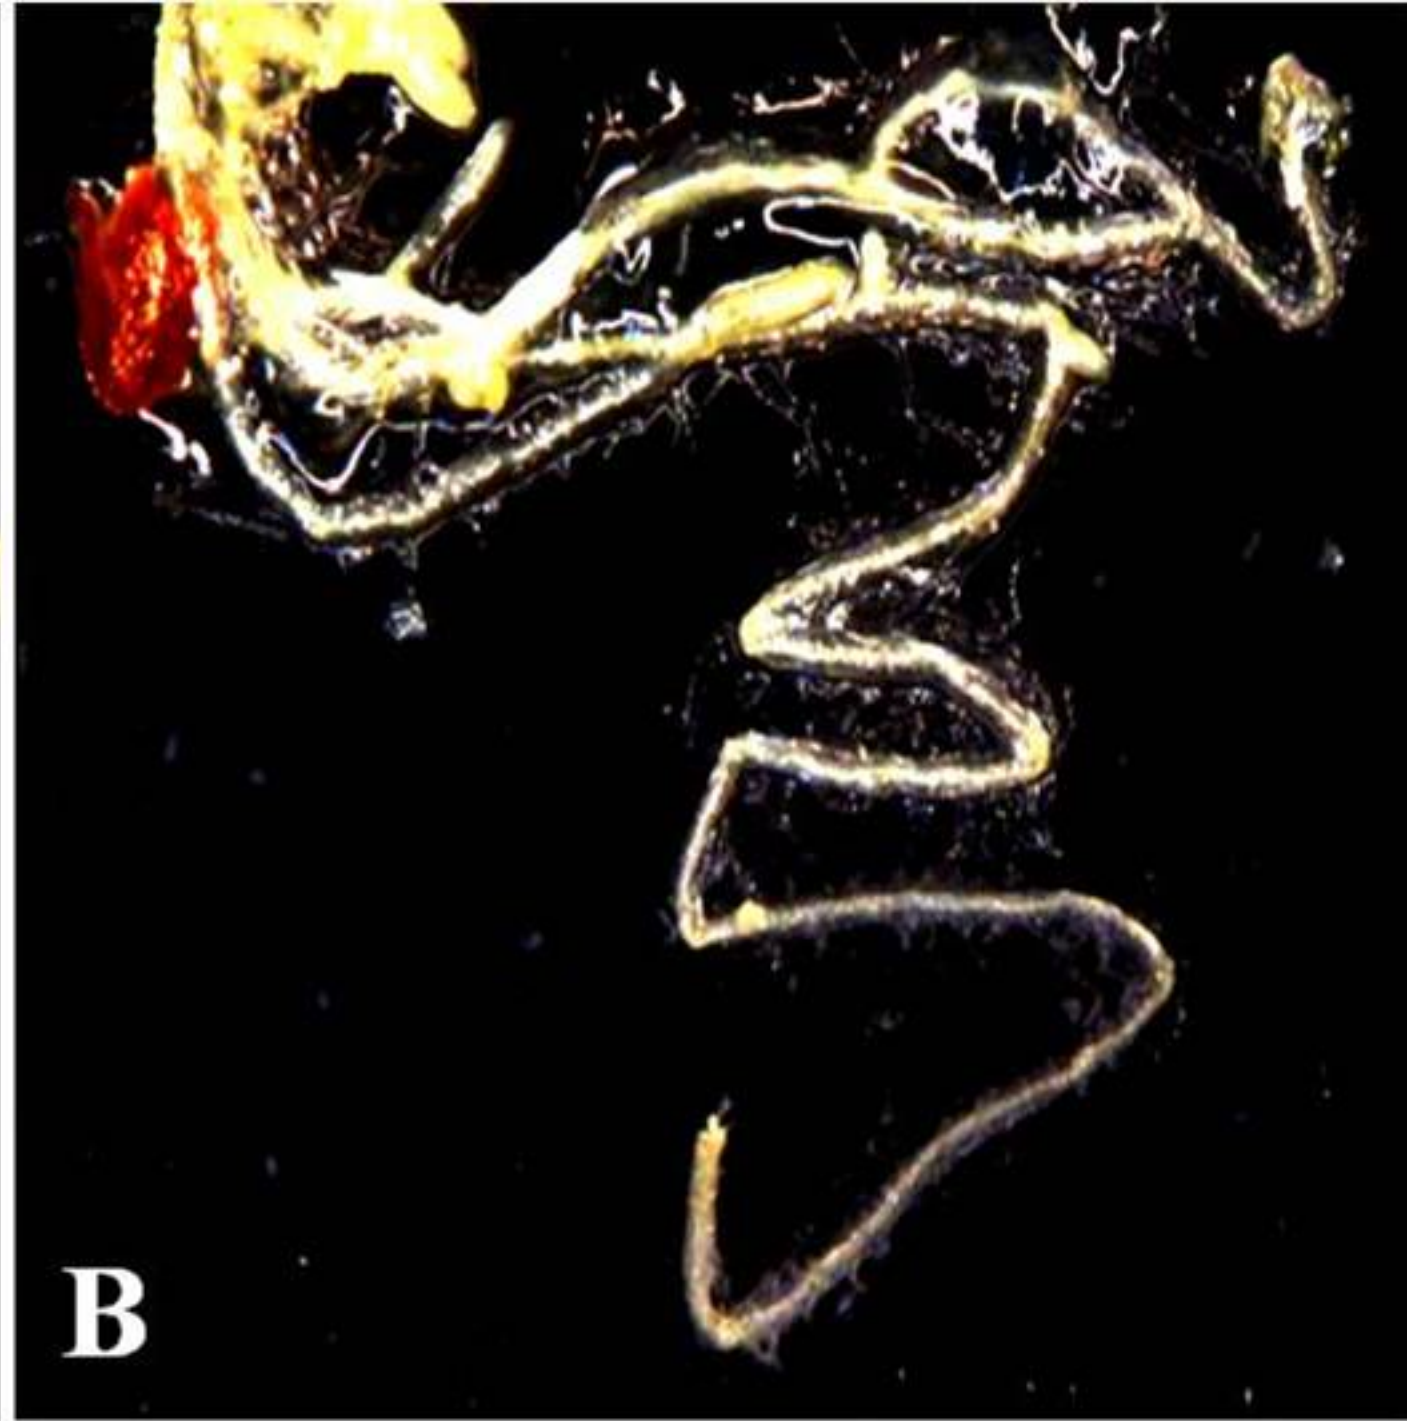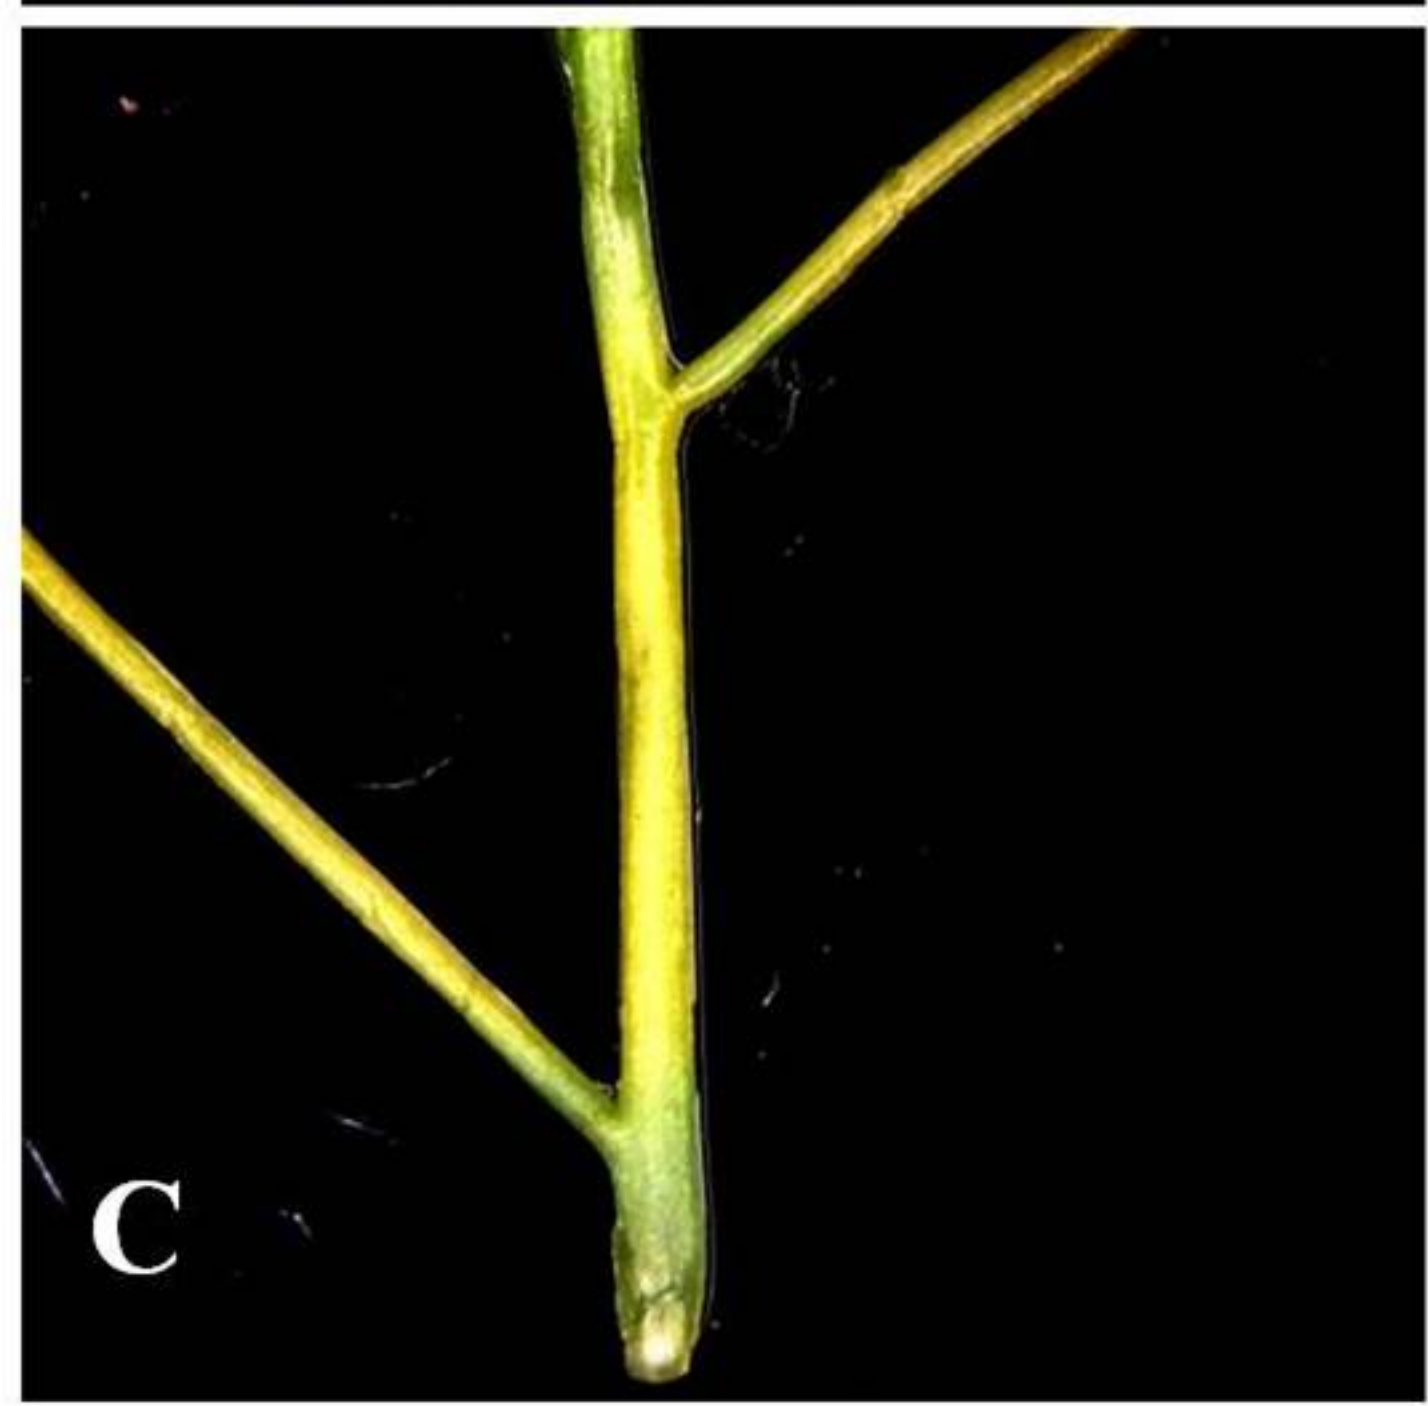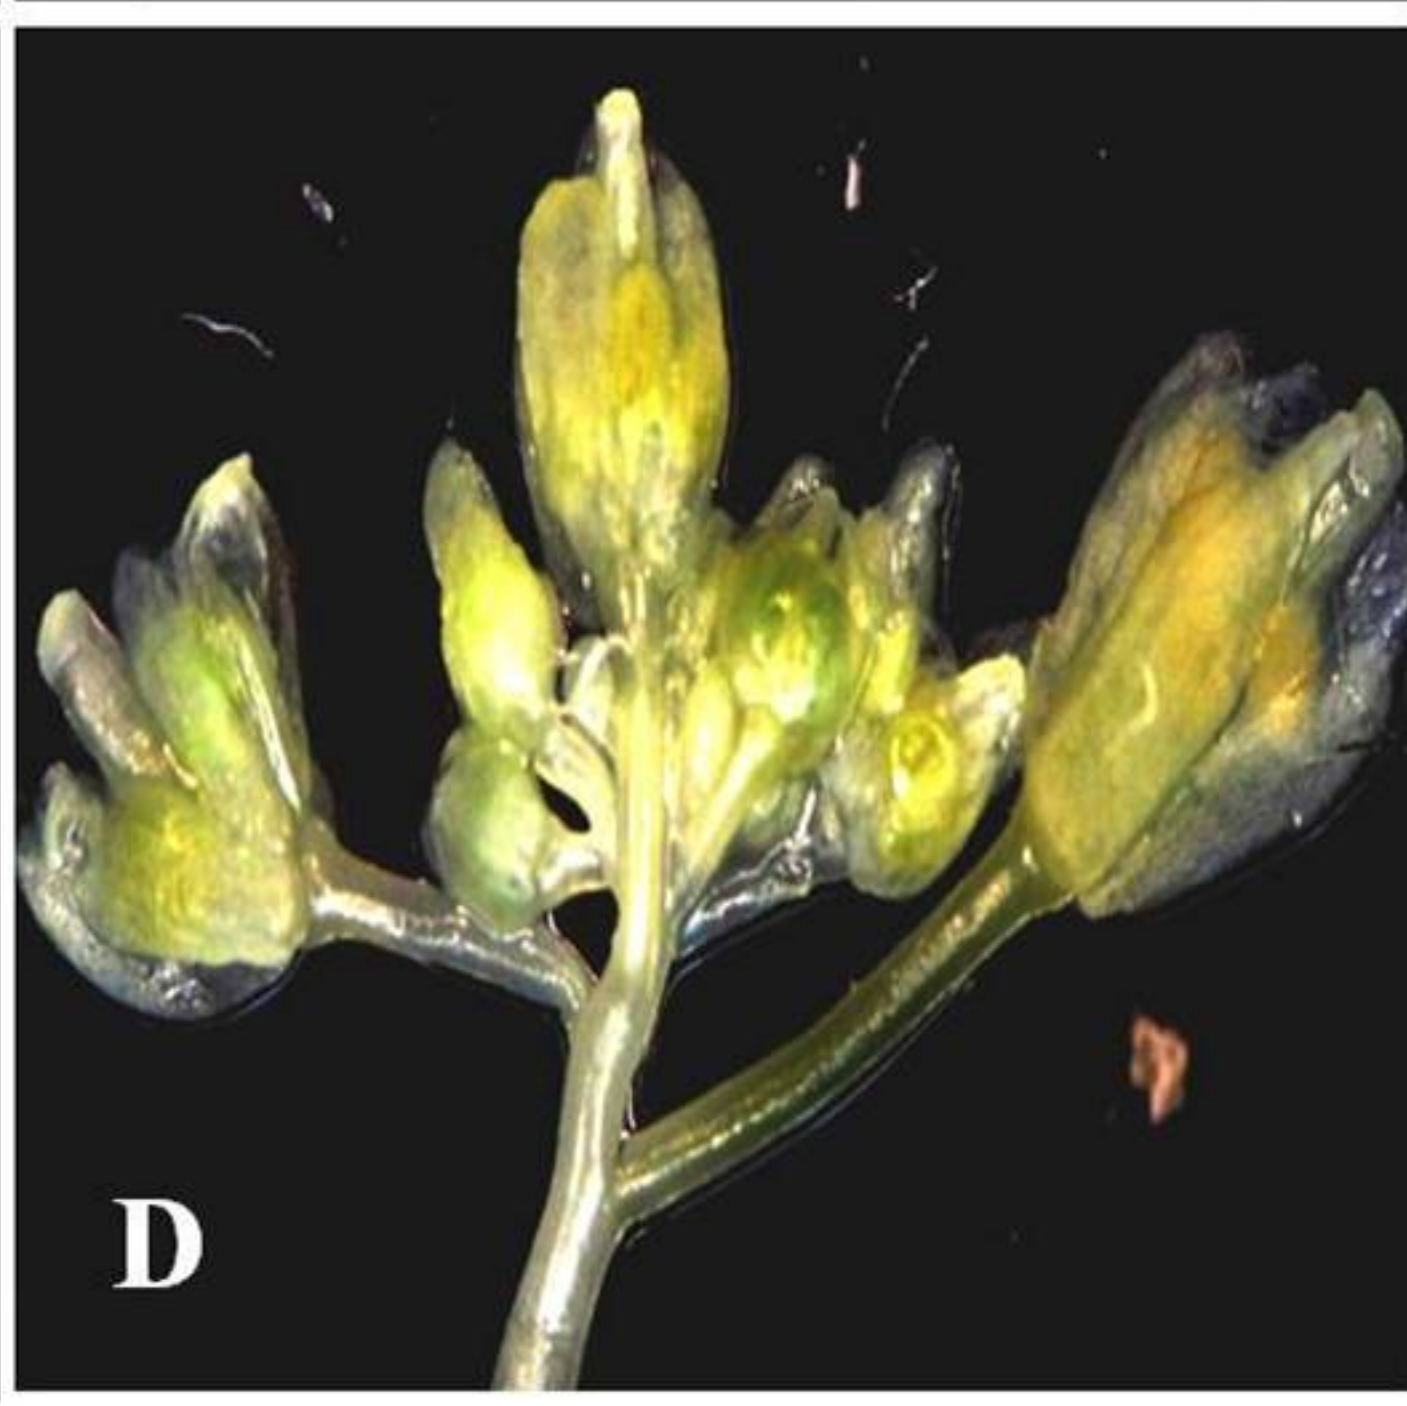

**Supplemental Figure S8.** GUS expression in transgenic *Arabidopsis* plants carrying *pAtHEMN1::uidA* construct. GUS expression was not found in seedlings (A), roots (B), or internodes (C) but was observed in flower buds (D).
