# Supplementary material
Source: PubMed Central journal article supplement (PMC5411134)
Supplement: supp_pp.16.01482_PP2016-01482DR2_Supplemental_Materialfig9.pdf [file supp_pp.16.01482_PP2016-01482DR2_Supplemental_Materialfig9.pdf]

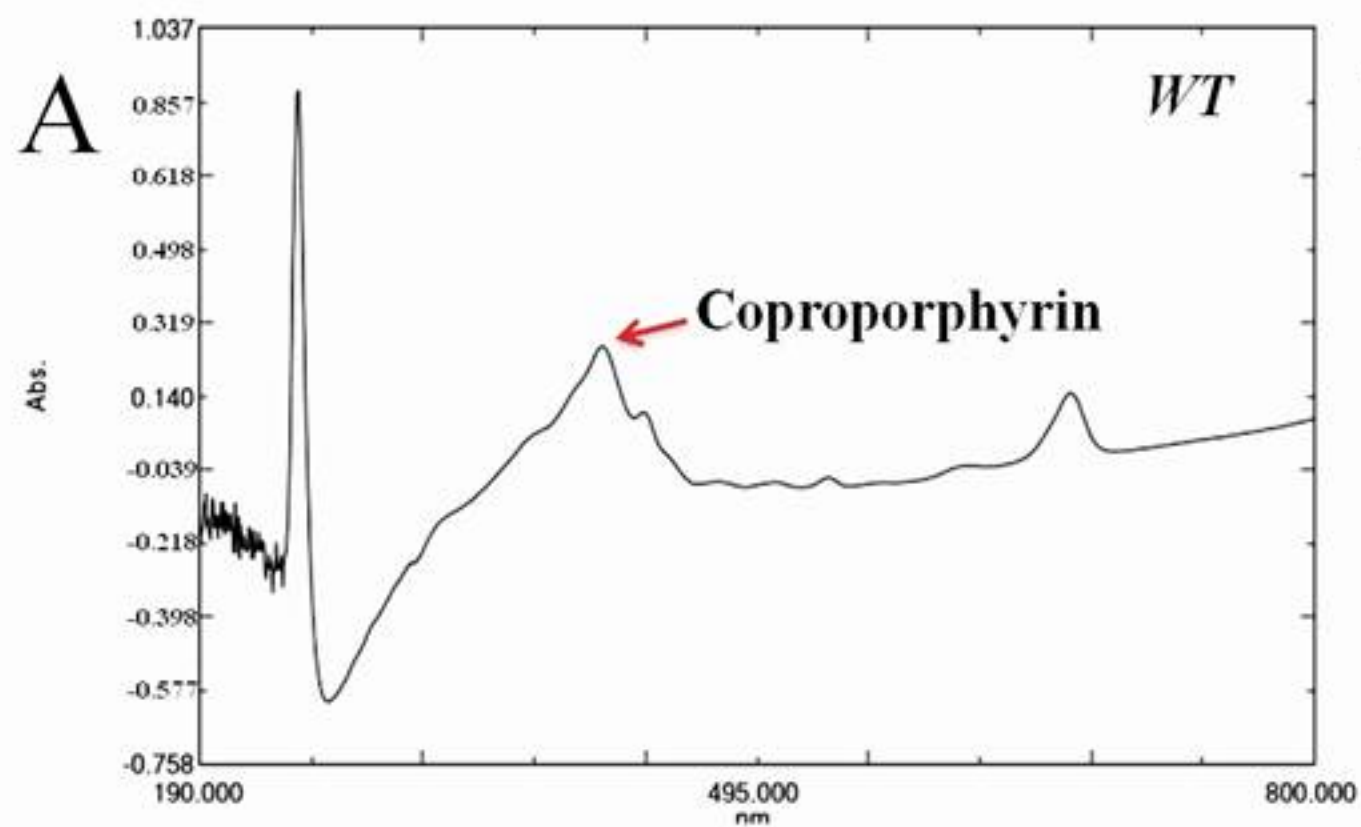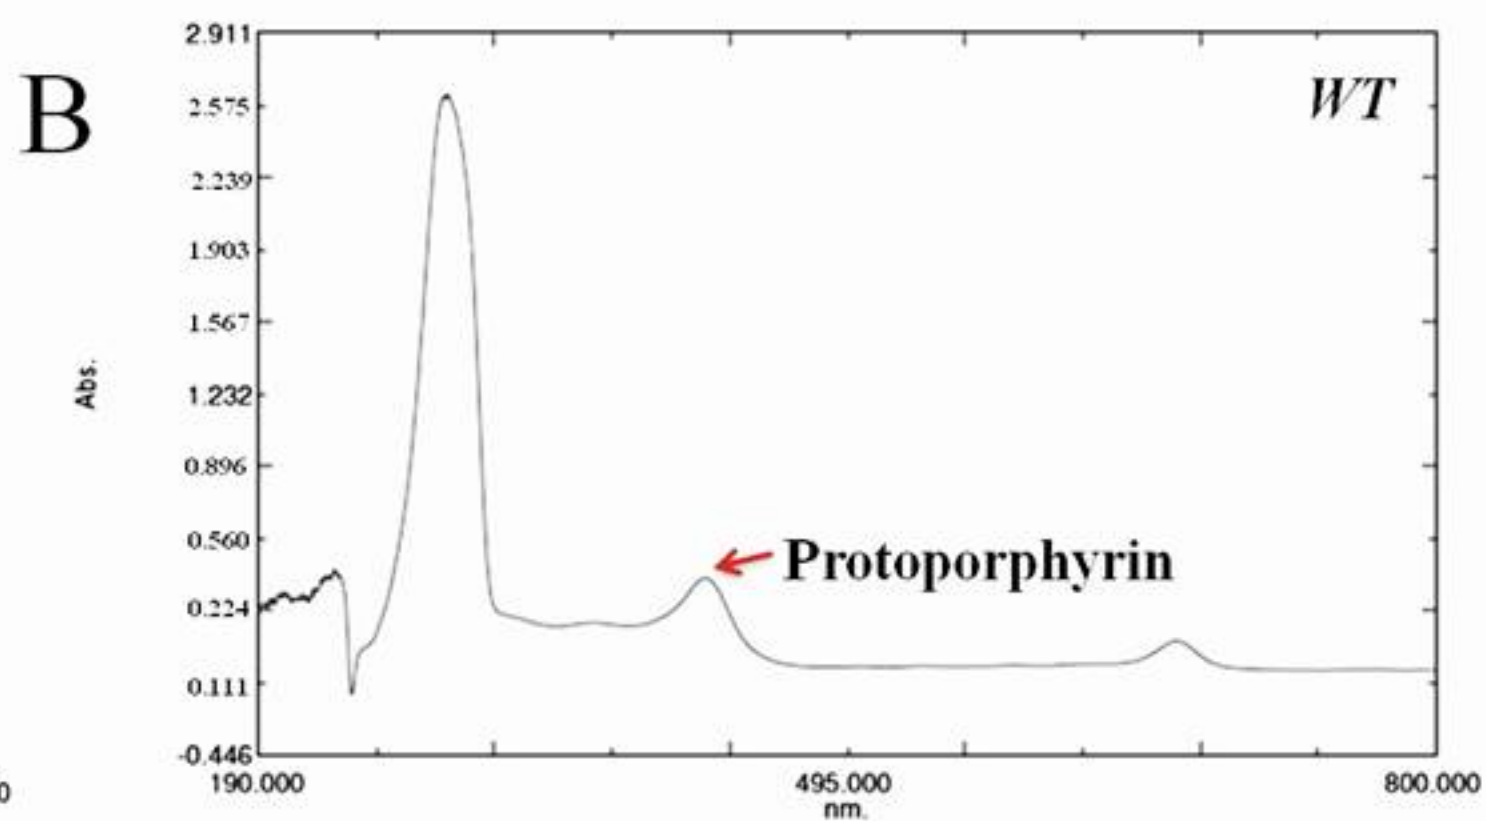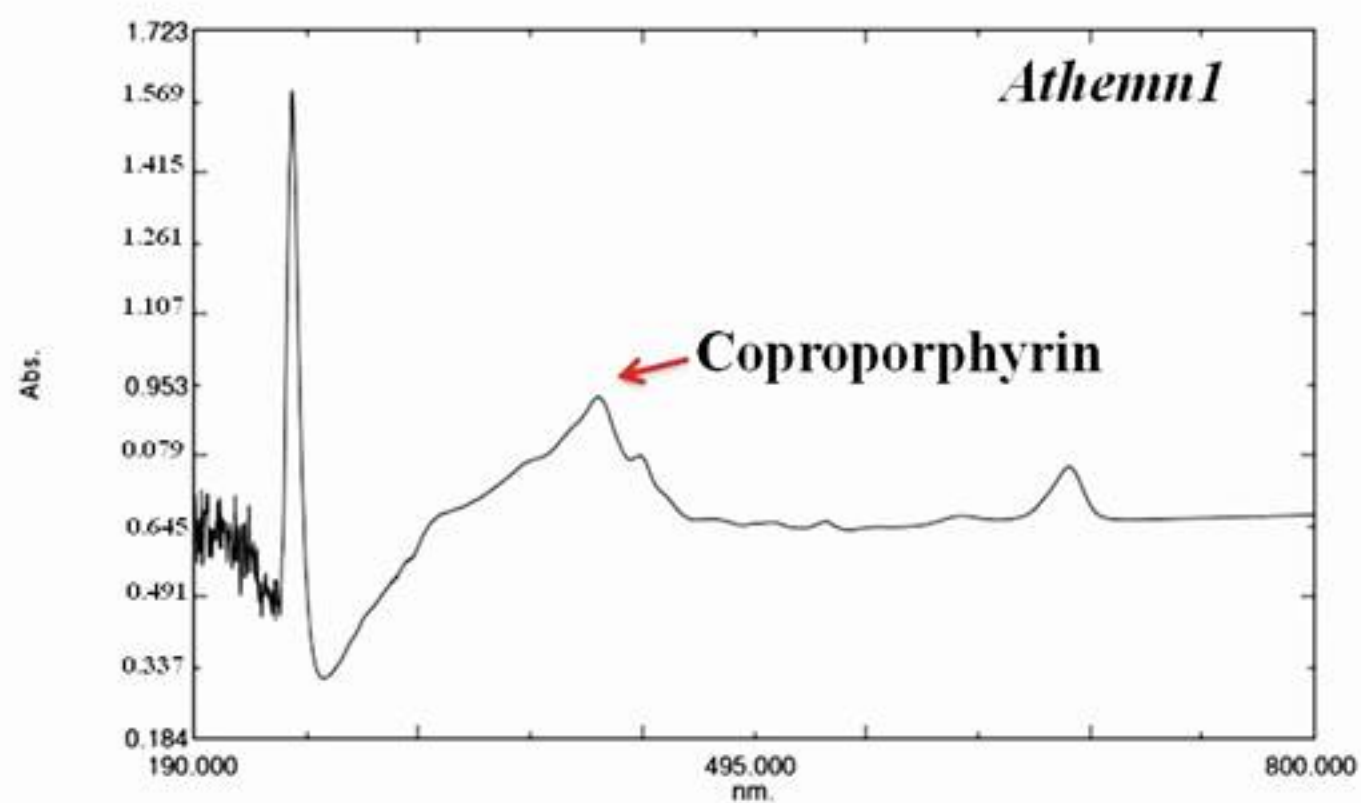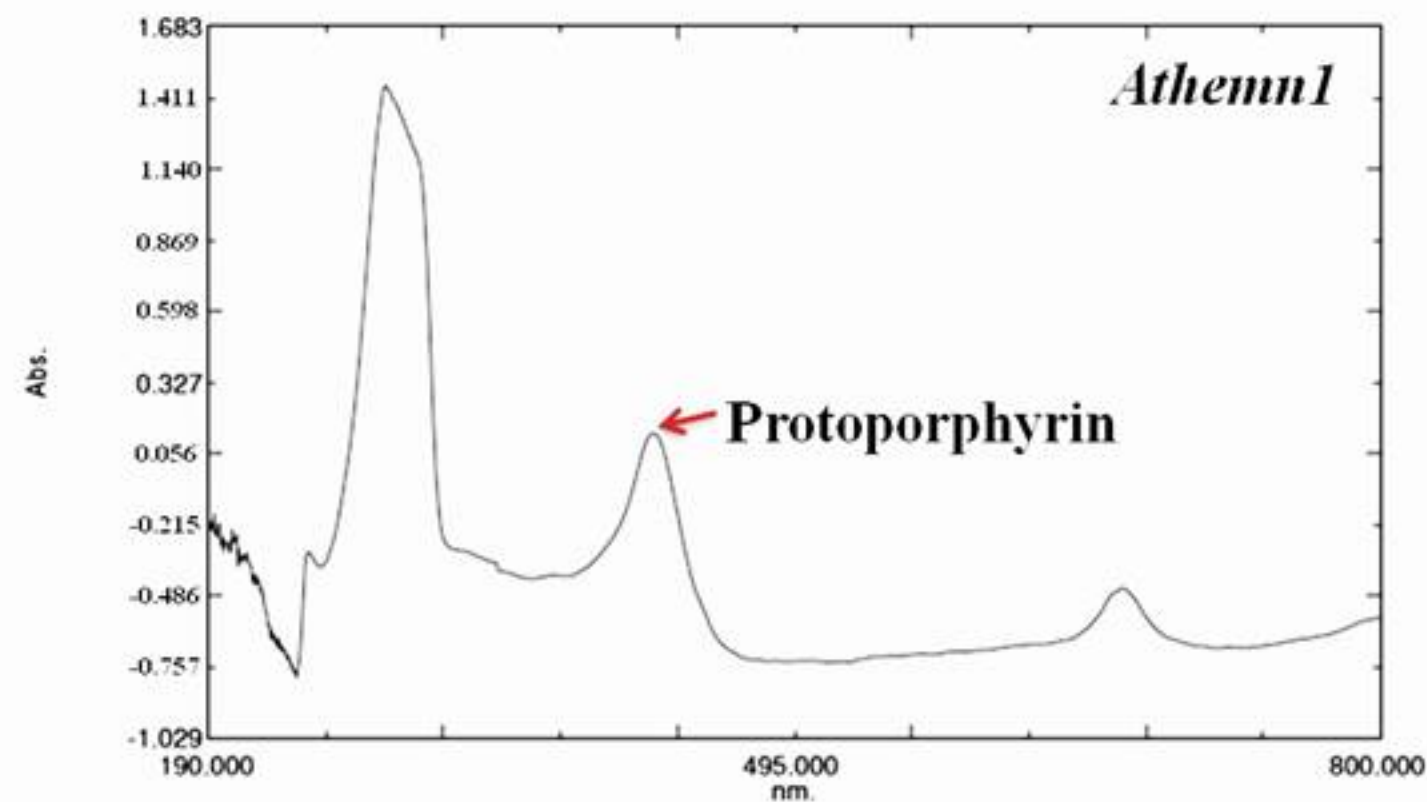

**Supplemental Figure S9.** UV visible spectra of purified Coproporphyrin and Protoporphyrin from WT and *Athemnl1-1* mutant inflorescences. Coproporphyrin and Protoporphyrin were isolated and the absorbance spectra of the purified Coproporphyrin and Protoporphyrin were measured over the Soret band 400-403 nm and 408-410 nm, respectively, using a scanning UV-Visible Spectrophotometer.
