# Supplementary material
Source: PubMed Central journal article supplement (PMC5411134)
Supplement: supp_pp.16.01482_PP2016-01482DR2_Supplemental_Materialtbl2.pdf [file supp_pp.16.01482_PP2016-01482DR2_Supplemental_Materialtbl2.pdf]

1 **Supplemental Table 2.** Details of similarity of AtHEMN1 with mitochondrial localized hemN type CPOs of different organisms

| S.No. | Description                                 | Max score | Total score | Query cover | E value   | Ident | Accession     |
|-------|---------------------------------------------|-----------|-------------|-------------|-----------|-------|---------------|
| 1     | XP_010444214.1 <i>Camelina sativa</i>       | 911       | 911         | 100%        | 0         | 91%   | 53682 Hem N-C |
| 2     | XP_009112073.1 <i>Brassica rapa</i>         | 872       | 872         | 100%        | 0         | 86%   | 53683 Hem N-C |
| 3     | XP_010444215.1 <i>Camellina</i>             | 827       | 827         | 100%        | 0         | 85%   | 53688 Hem N-C |
| 4     | XP_004299192.1 <i>Fragaria</i>              | 644       | 644         | 100%        | 0         | 67%   | 53690 Hem N-C |
| 5     | XP_002318108.2 <i>Populus trichocarpa</i>   | 645       | 645         | 100%        | 0         | 64%   | 53689 Hem N-C |
| 6     | XP_006476967.1 <i>Citrus</i>                | 645       | 645         | 99%         | 0         | 64%   | 53691 Hem N-C |
| 7     | XP_008361148.1 <i>Malus</i>                 | 471       | 471         | 77%         | 3.00E-167 | 63%   | 53693 Hem N-C |
| 8     | XP_002511254.1 <i>Ricinus communis</i>      | 623       | 623         | 100%        | 0         | 61%   | 53696 Hem N-C |
| 9     | XP_003522422.1 <i>Glycine</i>               | 583       | 583         | 99%         | 0         | 60%   | 53695 Hem N-C |
| 10    | NP_001066545.1 <i>Oryza sativa Japonica</i> | 527       | 527         | 87%         | 0         | 59%   | 53694 Hem N-C |
| 11    | NP_001152192.1 <i>Zea mays</i>              | 531       | 531         | 87%         | 0         | 59%   | 53698 Hem N-C |
| 12    | 73536239 Human Coproporphyrinogen           | 23.1      | 66.6        | 8%          | 0.014     | 56%   | 53702 Hem F   |
| 13    | P36551.3 HEM6 HUMAN mitochondrial           | 22.7      | 37.7        | 6%          | 0.021     | 56%   | 53703 Hem F   |
| 14    | 159487437 <i>Chlamydomonas reinhardtii</i>  | 18.5      | 65.8        | 14%         | 0.38      | 56%   | 53707 Hem F   |
| 15    | AHY75041.1 <i>Saccharomyces cerevisiae</i>  | 19.6      | 81.2        | 19%         | 0.17      | 50%   | 53687 Hem F   |
| 16    | NP_171847.4 LIN2 A <i>thaliana</i>          | 19.6      | 132         | 23%         | 0.2       | 44%   | 53686 Hem F   |
| 17    | XP_003074177.1 <i>Ostreococcus tauri</i>    | 350       | 350         | 86%         | 2.00E-119 | 44%   | 53692 Hem N-C |
| 18    | NP_440183.1 <i>Synechocystis sp</i>         | 18.1      | 93.9        | 45%         | 0.48      | 41%   | 53685 Hem F   |
| 19    | 77464802 <i>Rhodobacter sphaeroides</i>     | 184       | 184         | 70%         | 8.00E-57  | 34%   | 53706 Hem N-C |
| 20    | XP_005247182.1 <i>Homo sapiens</i>          | 15        | 43.5        | 5%          | 5.4       | 33%   | 53704 Hem F   |
| 21    | 384176173 <i>Bacillus subtilis</i>          | 213       | 231         | 83%         | 6.00E-68  | 33%   | 53705 Hem N-C |
| 22    | YP_002558347.1 <i>Escherichia coli</i>      | 117       | 131         | 62%         | 5.00E-33  | 27%   | 53699 Hem N-C |
| 23    | KFL09442.1 <i>Pseudomonas aeruginosa</i>    | 108       | 145         | 71%         | 9.00E-    | 27%   | 53700 Hem N-C |

|    |                             |      |      |     |          |     |       |         |
|----|-----------------------------|------|------|-----|----------|-----|-------|---------|
|    |                             |      |      |     | 30       |     |       |         |
| 24 | Q42840.1 HEM6 HOR VU        | 18.5 | 51.6 | 12% | 0.46     | 25% | 53697 | Hem F   |
| 25 | AGF51906.1_Synechocystis sp | 114  | 114  | 63% | 4.00E-32 | 24% | 53684 | Hem N-C |

2
